# Supplementary material for: Genomic and morphological evidence of distinct populations in the endemic common (weedy) seadragon Phyllopteryx taeniolatus (Syngnathidae) along the east coast of Australia
Source: PLoS One. 2020 Dec 23;15(12):e0243446. doi: 10.1371/journal.pone.0243446 (PMC7757807; doi:10.1371/journal.pone.0243446)
Supplement: S2 Table — Data for all 15 body measurements of adult P. taeniolatus see Fig 2 for details. Where possible male and female of an individual seadragon is indicated. (XLSX) [file pone.0243446.s006.xlsx]

## Sheet: Morph data
S2 Table Morphology data. Genomic and morphological evidence of distinct subpopulations in the endemic weedy seadragon Phyllopteryx taeniolatus (Syngnathidae) along the east coast of Australia
(measurements in mm)		NSW C-V																				TAS. W-AA					VIC AB-AU
Measurements	Description	Batemans Bay	Batemans Bay	Batemans Bay	Batemans Bay	Batemans Bay	Shelley Beach	Sydney	Sydney	Sydney	Sydney	Sydney	Wollongong	Narabeen	Kurnell	Kurnell	Kurnell	Kurnell	Eden	Eden	Eden	Bicheno	Bicheno	Blackmans Bay	Bicheno	Bicheno	Flinders	Flinders	Flinders	Flinders	Flinders	Flinders	Flinders	Flinders	Flinders	Flinders	Flinders	Portsea	Portsea	Portsea	Portsea	Portsea	Portsea	Portsea	Portsea	Portsea
A-B	tip-snout end	48.349	48.061	60.879	50.4	53.967	46.036	71.451	51.01	46.657	41.516	56.411	45.439	45.803	72.955	48.166	27.163	56.377	35.174	38.866	46.374	60.426	31.973	32.137	32.834	38.251	54.093	49.788	45.721	35.878	32.342	36.856	31.645	35.359	38.536	33.8	40.511	49.134	46.397	43.551	39.576	43.423	48.744	41.752	34.724	44.128
B-C	snout end-eye ridge	10.86	12.476	14.109	11.628	13.66	10.81	17.895	13.486	12.585	8.914	15.376	10.487	10.706	16.446	11.981	7.265	11.247	10.509	10.568	12.224	15.054	3.674	9.424	6.179	7.862	13.307	9.257	11.646	11.003	10.7	9.237	6.361	11.232	9.657	7.83	9.397	12.33	13.95	11.274	8.911	11.427	9.417	9.869	9.323	8.852
C-D	eye ridge-base head	11.829	11.423	13.008	12.696	12.434	14.102	19.256	12.449	15.558	14.93	12.326	16.17	15.404	29.154	16.351	10.801	17.727	11.616	10.951	17.714	18.68	11.881	16.61	9.489	19.95	16.868	13.297	16.147	10.032	9.143	14.054	12.841	13.784	12.566	13.74	14.096	12.878	15.353	15.687	17.308	13.555	17.535	12.764	13.409	14.449
D-E	base head-posterior head	4.253	10.325	10.628	9.049	7.423	4.094	6.923	4.712	2.744	3.211	4.062	2.349	3.439	3.951	2.638	3.466	3.093	2.9	2.156	2.103	3.021	2.301	1.211	1.698	3.154	3.704	2.09	1.94	2.039	1.973	3.24	2.235	2.825	4.365	2.465	2.102	1.934	3.218	1.626	2.296	3.032	1.435	2.955	2.629	2.579
E-F	posterior head-base nape	23.384	23.982	33.421	23.694	21.834	19.735	25.454	25.563	27.031	19.624	26.457	24.058	24.258	39.639	26.711	18.031	27.438	21.396	24.425	23.042	32.368	19.916	28.232	26.443	33.693	28.359	23.666	26.989	22.044	24.326	21.713	21.315	24.544	21.696	20.705	22.008	26.814	27.938	27.259	24.688	24.499	27.111	22.96	22.532	25.707
F-G	base nape-nape	14.831	18.954	14.128	24.935	22.872	8.313	19.062	17.21	21.563	12.334	17.494	16.617	17.267	31.684	21.421	13.615	18.935	22.383	14.07	19.495	29.803	17.503	18.704	27.317	23.978	17.513	18.049	18.928	17.434	19.696	17.987	20.039	17.279	17.815	16.759	17.149	21.99	24.212	22.228	21.41	19.579	23.742	21.032	20.581	22.959
G-H	nape-base dorsal	60.887	80.329	70.469	70.096	73.803	54.976	82.074	73.363	67.537	67.402	67.06	69.42	62.297	104.967	67.179	42.72	73.966	44.54	54.169	52.909	68.912	46.195	67.343	67.048	71.851	57.835	41.199	62.919	45.517	52.525	45.622	41.258	55.733	48.356	41.974	45.791	53.47	55.383	51.022	54.639	53.318	52.044	52.364	52.409	56.793
H-I	base dorsal-anterior fin	37.719	38.095	30.293	44.904	44.427	38.346	52.863	38.876	40.255	38.021	46.783	39.667	36.791	48.218	37.334	25.957	39.896	25.23	28.615	23.25	28.657	23.173	39.537	45.775	46.368	23.647	13.44	27.632	21.548	21.706	25.136	22.462	20.686	24.198	28.298	22.752	28.118	27.317	29.706	28.596	27.238	26.121	26.558	27.541	26.917
I-J	anterior fin-posterior fin	45.1	47.224	38.715	39.988	37.226	40.674	51.936	51.166	43.331	38.561	40.809	36.319	42.58	56.734	51.272	28.563	45.709	30.005	38.6	23.932	48.723	34.704	55.194	44.696	44.616	34.962	29.431	47.399	34.584	41.686	37.814	44.323	38.551	35.438	45.076	38.452	50.823	47.974	43.607	33.937	43.694	44.261	34.923	37.169	41.093
J-K	posterior fin-base 1 tail	10.655	15.076	17.022	18.015	15.771	16.451	20.04	10.015	18.188	19.396	10.891	19.061	13.934	19.149	12.997	13.126	14.395	6.674	17.748	25.204	26.086	14.528	16.207	27.767	28.927	24.065	8.596	5.82	16.828	13.978	17.33	12.597	15.966	19.875	20.192	12.609	21.28	12.829	13.846	13.613	22.393	10.147	14.047	10.858	11.247
K-L	base 1 tail-base 2 tail	30.873	62.618	40.748	35.755	42.133	37.614	41.877	32.047	32.859	34.024	34.264	45.883	32.781	27.91	46.856	25.865	36.436	25.493	34.432	35.551	32.532	15.381	24.746	40.111	50.088	32.094	27.205	31.533	29.483	35.14	27.824	30.791	33.442	24.056	32.722	32.488	41.152	31.096	35.822	29.046	29.167	33.546	31.002	26.09	30.495
L-M	base 2 tail-end of tail	44.052	103.274	88.182	79.174	102.962	77.223	95.798	81.99	75.179	71.751	67.001	102.282	75.646	79.749	89.878	51.763	63.44	54.26	57.785	62.463	75.263	33.266	46.849	71.294	18.172	62.794	59.056	88.4	61.181	60.885	50.372	45.867	55.566	45.045	56.092	75.161	90.767	57.427	71.181	53.152	67.805	78.6	55.555	51.179	42.407
BD1	Body Depth 1	46.494	43.395	51.292	60.727	58.953	42.906	62.18	46.608	54.281	47.768	54.469	41.87	45.22	63.679	52.525	25.903	55.045	29.366	32.387	38.071	52.972	34.959	59.484	51.278	56.826	35.062	24.125	44.479	31.277	31.766	34.146	27.996	32.676	29.502	34.187	34.856	37.317	36.492	35.224	37.119	33.827	34.922	31.486	35.101	32.161
BD2	Body Depth 2	42.714	40.069	42.073	57.554	56.009	44.152	57.644	42.229	49.529	43.78	51.176	40.908	43.562	53.657	43.102	19.564	47.687	23.82	26.931	33.664	43.722	32.11	53.82	49.654	50.032	27.868	17.527	38.855	26.147	27.077	28.091	25.452	27.235	24.181	29.77	30.751	31.673	29.707	28.74	33.051	28.343	28.331	25.845	30.689	26.872
3	Split btwn body and tail	18.131	21.343	21.344	22.093	20.183	18.74	24.599	23.223	21.211	18.689	21.097	22.248	18.913	27.024	20.234	11.367	21.722	11.793	14.381	17.655	23.599	14.716	26.473	19.229	21.687	19.298	10.674	19.206	14.523	15.841	14.73	15.535	17.531	16.697	16.641	16.263	19.79	18.992	18.246	15.645	16.733	16.587	15.245	15.486	16.452
	total TL	342.792	471.837	431.602	420.334	448.512	368.374	504.629	411.887	403.487	369.684	398.934	427.752	380.906	530.556	432.784	268.335	408.659	290.18	332.385	344.261	439.525	254.495	356.194	400.651	386.91	369.241	295.074	385.074	307.571	324.1	307.185	291.734	324.967	301.603	319.653	332.516	410.69	363.094	366.809	327.172	359.13	372.703	325.781	308.444	327.626
	Sex	dead	dead	dead	dead	dead	dead	dead	dead	dead	dead	dead	dead	dead	male	female	male	female	live	live	live	female	male	female	female	female	male	female	female	male	male	male	male	male	male	male	female	male	male	male	male	male	male	male	female	male
